# Supplementary material for: Solvent-induced single-crystal-to-single-crystal transformation and tunable magnetic properties of 1D azido-Cu(ii) chains with a carboxylate bridge
Source: Royal Society of Chemistry journal article supplement (doi:10.1039/c9dt02031d), 2019-01-01
Supplement: c9dt02031d1.pdf [file c9dt02031d1.pdf]

## Supporting Information

### Solvent-induced single-crystal-to-single-crystal transformation and tunable magnetic property of 1D azido-Cu(II) chains with carboxylate bridge

Xiangyu Liu,<sup>\*,a,b</sup> Xiufang Ma,<sup>a</sup> Jinhui Yang,<sup>a</sup> Shuchang Luo,<sup>\*,d</sup> Zheng Wang,<sup>a</sup> Jesús Ferrando-Soria,<sup>b</sup> Yulong Ma,<sup>a</sup> Quan Shi,<sup>\*,c</sup> and Emilio Pardo<sup>b</sup>

<sup>a</sup> State Key Laboratory of High-efficiency Utilization of Coal and Green Chemical Engineering, College of Chemistry and Chemical Engineering, Ningxia University, Yinchuan 750021, China

<sup>b</sup> Departamento de Química Inorgánica, Instituto de Ciencia Molecular (ICMOL), Universidad de Valencia, Paterna 46980, Valencia, Spain.

<sup>c</sup> Dalian Institute of Chemical Physics, Chinese Academy of Sciences, 457 Zhongshan Road, Dalian 116023, China

<sup>d</sup> School of Chemical Engineering, Guizhou University of Engineering Science, Bijie, 551700, China

#### Contents

**Table S1.** Selected bond lengths (Å) and bond angles (°) for **1-3**.

**Table S2.** Structural and magnetic parameters for Cu(II)-azido mixed-bridged compounds.

**Figure S1.** Magnetic cores used for computational study: (a) **1**, (b) **2**, (c) **3**.

**Figure S2.**  $\pi\cdots\pi$  stacking between benzene rings in **1**.

**Figure S3.** TG curves for **1-3**.

**Figure S4.** PXRD patterns for compounds: (a) **1**, (b) **2**, (c) **3**.

**Figure S5.** (a)  $M$  vs.  $H$  plots at 2 K for compounds: (a) **1**, (b) **2**, (c) **3**.

**Figure S6.**  $\chi'_M$  and  $\chi''_M$  vs  $T$  plots for **1**.

**Figure S7.**  $\chi_M$  vs  $T$  plots for **2** (a) and **3** (b).

**Figure S8.** (a) Hysteresis loops for **2** (a) and **3** (b) at different temperatures.

#### References

#### \*Corresponding author

**Dr. Xiangyu Liu**

**E-mail: xiangyuliu432@126.com**

**Prof. Quan Shi**

**E-mail: shiquan@dicp.ac.cn**

**Dr. Shuchang Luo**

**E-mail: luosc@gues.edu.cn**

**Table S1.** Selected bond lengths (Å) and bond angles (°) for **1-3**.

|                     | <b>1</b>   |                     | <b>2</b>  |                        | <b>3</b>  |  |
|---------------------|------------|---------------------|-----------|------------------------|-----------|--|
| Cu(1)-O(1)#1        | 1.966(5)   | Cu(1)-O(1)          | 1.957(7)  | Cu(1)-O(2)             | 1.954(4)  |  |
| Cu(1)-O(1)          | 1.966(5)   | Cu(1)-O(1)#1        | 1.957(7)  | Cu(1)-O(1)             | 1.962(4)  |  |
| Cu(1)-N(1)#1        | 1.985(6)   | Cu(1)-N(1)          | 1.998(9)  | Cu(1)-N(1)#1           | 1.992(5)  |  |
| Cu(1)-N(1)          | 1.985(6)   | Cu(1)-N(1)#1        | 1.998(9)  | Cu(1)-N(1)             | 1.995(5)  |  |
| O(1)-C(6)           | 1.274(9)   | Cu(1)-O(3)          | 2.495(8)  | Cu(1)-O(3)             | 2.419(4)  |  |
| O(2)-C(6)           | 1.256(9)   | Cu(1)-O(3)#1        | 2.515(8)  | Cu(1)-O(3)#1           | 2.513(4)  |  |
| N(1)-N(2)           | 1.228(9)   | O(1)-C(1)           | 1.300(13) | O(1)-C(1)              | 1.257(7)  |  |
| N(2)-N(3)           | 1.150(9)   | O(2)-C(1)           | 1.289(13) | C(1)-O(2)#1            | 1.259(7)  |  |
| N(4)-N(5)           | 1.253(9)   | O(3)-C(8)           | 1.414(16) | N(5)-N(6)              | 1.106(11) |  |
| C(3)-C(13)          | 1.398(10)  | N(1)-N(2)           | 1.195(12) | N(5)-N(4)              | 1.253(11) |  |
| C(3)-C(12)          | 1.404(10)  | N(2)-N(3)           | 1.174(13) | N(1)-N(2)              | 1.234(7)  |  |
| C(3)-C(6)           | 1.485(9)   | N(4)-N(5)           | 1.29(2)   | N(2)-N(3)              | 1.115(7)  |  |
| O(1)#1-Cu(1)-O(1)   | 180.0(3)   | O(1)-Cu(1)-O(1)#1   | 180.0(4)  | O(2)-Cu(1)-O(1)        | 177.78    |  |
| O(1)#1-Cu(1)-N(1)#1 | 88.2(2)    | O(1)-Cu(1)-N(1)     | 91.3(3)   | O(2)-Cu(1)-O(1)        | 90.65(19) |  |
| O(1)-Cu(1)-N(1)#1   | 91.8(2)    | O(1)#1-Cu(1)-N(1)   | 88.7(3)   | O(1)-Cu(1)-N(1)#1      | 90.54(19) |  |
| O(1)#1-Cu(1)-N(1)   | 91.8(2)    | O(1)-Cu(1)-N(1)#1   | 88.7(3)   | O(2)-Cu(1)-N(1)        | 89.42(19) |  |
| O(1)-Cu(1)-N(1)     | 88.2(2)    | O(1)#1-Cu(1)-N(1)#1 | 91.3(3)   | O(1)-Cu(1)-N(1)        | 89.51(19) |  |
| N(1)#1-Cu(1)-N(1)   | 180.0      | N(1)-Cu(1)-N(1)#1   | 180.0     | N(1)#1-Cu(1)-N(1)      | 176.20(1) |  |
| O(2)#1-Cu(2)-O(2)#2 | 91.2(2)    | O(1)-Cu(1)-O(3)     | 87.2(3)   | O(2)-Cu(1)-O(3)        | 91.87(18) |  |
| O(2)#2-Cu(2)-N(1)   | 88.8(2)    | O(1)#1-Cu(1)-O(3)   | 92.8(3)   | O(1)-Cu(1)-O(3)        | 86.34(17) |  |
| O(2)#1-Cu(2)-N(1)#3 | 88.8(2)    | N(1)-Cu(1)-O(3)     | 84.4(3)   | N(1)#1-Cu(1)-O(3)      | 86.63(18) |  |
| O(2)#2-Cu(2)-N(1)#3 | 91.2(2)    | N(1)#1-Cu(1)-O(3)   | 95.6(3)   | N(1)-Cu(1)-O(3)        | 97.16(17) |  |
| N(1)-Cu(2)-N(1)#3   | 180.0      | O(2)#2-Cu(2)-O(2)   | 180.0(4)  | C(1)-O(1)-Cu(1)        | 129.7(4)  |  |
| C(6)-O(1)-Cu(1)     | 134.2(5)   | O(2)#2-Cu(2)-N(1)   | 89.3(3)   | O(1)-C(1)-O(2)#1       | 127.4(5)  |  |
| C(6)-O(2)-Cu(2)#4   | 131.2(5)   | O(2)-Cu(2)-N(1)     | 90.7(3)   | O(1)-C(1)-C(2)         | 116.3(5)  |  |
| N(2)-N(1)-Cu(1)     | 119.3(5)   | O(2)#2-Cu(2)-N(1)#2 | 90.7(3)   | N(2)-N(1)-Cu(1)#2      | 120.7(4)  |  |
| N(2)-N(1)-Cu(2)     | 113.5(5)   | O(2)-Cu(2)-N(1)#2   | 89.3(3)   | N(2)-N(1)-Cu(1)        | 119.7(4)  |  |
| Cu(1)-N(1)-Cu(2)    | 127.2(3)   | N(1)-Cu(2)-N(1)#2   | 180.0     | Cu(1)#2-N(1)-Cu(1)     | 104.5(2)  |  |
| N(3)-N(2)-N(1)      | 179.0(9)   | N(3)-N(2)-N(1)      | 176.1(16) | N(3)-N(2)-N(1)         | 176.4(9)  |  |
| N(6)-N(5)-N(4)      | 116.3(7)   | N(6)-N(5)-N(4)      | 174(2)    | C(8)-O(3)-Cu(1)        | 124.8(4)  |  |
| #1 -x+1,-y+2,-z+1   | #2 x,y-1,z | #1 -x,-y+1,-z+1     |           | #1 -x+1/2,y+1/2,-z+1/2 |           |  |
| #3 -x+1,-y+1,-z+1   | #4 x,y+1,z | #2 -x+1,-y+1,-z+1   |           | #2 -x+1/2,y-1/2,-z+1/2 |           |  |

**Table S2.** Structural and magnetic parameters for Cu(II)-azido mixed-bridged compounds.

| Unit | Formula                                                                                                                       | Cu-N-Cu(°) | Cu...Cu(Å)<br>(intrachain) | $J^a$ (cm <sup>-1</sup> ) | Ref. |
|------|-------------------------------------------------------------------------------------------------------------------------------|------------|----------------------------|---------------------------|------|
| 2Cu  | [Cu <sub>2</sub> (N <sub>3</sub> ) <sub>2</sub> (NO <sub>3</sub> ) <sub>2</sub> (L <sup>1</sup> ) <sub>2</sub> ] <sub>n</sub> | 119.5      | 3.44                       | 26                        | 1    |

|       |                                                                             |                |              |                              |    |
|-------|-----------------------------------------------------------------------------|----------------|--------------|------------------------------|----|
| 1Cu   | $\{[\text{Cu}(\text{Hpht})(\text{N}_3)]\text{H}_2\text{O}\}_n$              | 111.9          | 3.28         | 75                           | 2  |
| 1Cu   | $[\text{Cu}(\text{INO})(\text{N}_3)(\text{H}_2\text{O})_{0.5}]_n$           | 106.6          | 3.22         | 80                           | 3  |
| 1Cu   | $[\text{Cu}(\text{NNO})(\text{N}_3)(\text{H}_2\text{O})_{0.5}]_n$           | 124.3          | 3.52         | 48                           | 3  |
| 1.5Cu | $[\text{Cu}_{1.5}(\text{N}_3)_2(\text{isonic})]_n$                          | 106.7          | 3.20         | 80                           | 4  |
| 3Cu   | $[\text{Cu}_3((\text{R})\text{-phea})_2(\text{N}_3)_6]_n$                   | 101.8          | 3.04         | 15.27                        | 5  |
| 3Cu   | $[\text{Cu}_3((\text{S})\text{-phea})_2(\text{N}_3)_6]_n$                   |                |              |                              |    |
| 1Cu   | $[\text{Cu}(\text{N}_3)(\text{nic})]_n$                                     | 113.6          | 3.35         | 39.1                         | 6  |
| 1.5Cu | $[\text{Cu}_{1.5}(\text{hnta})(\text{N}_3)_2(\text{H}_2\text{O})]_n$        | 103.2          | 3.12         | 89                           | 7  |
| 3Cu   | $[\text{Cu}_3(\text{hnta})_4(\text{N}_3)_2(\text{H}_2\text{O})_3]_n$        | 116.2          | 3.39         | 69.7                         | 7  |
| 1Cu   | $[\text{Cu}(\text{N}_3)(\text{tp})(\text{CH}_3\text{OH})]_n$                | 105.5          | 3.19         | 63                           | 8  |
| 2Cu   | $[\text{Cu}_2(4\text{-pya})_2(\text{N}_3)_2(\text{DMF})]_n$                 | 102.1          | -            | 145                          | 9  |
| 1Cu   | $[\text{Cu}(\text{benzoate})(\text{N}_3)]_n$                                | 126.8          | 3.54         | 33.90                        | 10 |
| 1Cu   | $[\text{Cu}(\text{L}^2)(\text{N}_3)]_n$                                     | 108.2          | 3.23         | 93.10                        | 10 |
| 1Cu   | $[\text{Cu}(1\text{-naphthoate})(\text{N}_3)]_n$                            | 116.8          | 3.41         | 65.63                        | 10 |
| 1Cu   | $[\text{Cu}(\text{N}_3)(p\text{-CPA})]_n$                                   | 107.0          | 3.18         | 68.82                        | 11 |
| 1Cu   | $[\text{Cu}(2\text{-Clnic})(\text{N}_3)(\text{CH}_3\text{OH})]_n$           | 110.3          | 3.29         | 81.22                        | 12 |
| 3Cu   | $[\text{Cu}_3(\text{pyz})_2(\text{N}_3)_6]_n$                               | 100.5          | 3.09         | 118.8                        | 13 |
| 1Cu   | $[\text{Cu}(\text{mptz})(\text{N}_3)_2]_n$                                  | 103.3          | 3.15         | 65.4                         | 14 |
| 1Cu   | $[\text{Cu}(4,3\text{-pybz})(\text{N}_3)]_n$                                | 109.4          | 3.25         | 63.9                         | 15 |
| 2Cu   | $[\text{Cu}_2(4,4\text{-pybz})_3(\text{N}_3)]_n \cdot 3\text{nH}_2\text{O}$ | 101.1          | 3.08         | 93.6                         | 15 |
| 4Cu   | $[\text{Cu}_4(\text{N}_3)_8(\text{Me-hmpz})_2]_n$                           | 101.0          | 3.11         | $J_1=40.57$<br>$J_2=28.47$   | 16 |
| 4Cu   | $[\text{Cu}_4(\text{N}_3)_8(\text{men})_2]_n$                               | 102.2          | 3.40         | $J_1=57.97$<br>$J_2=-14.03$  | 16 |
| 5Cu   | $[\text{Cu}_5(\text{N}_3)_{10}(\text{N},\text{N}'\text{-dmen})_2]_n$        | 101.6          | 3.40         | $J_1=-494.99$<br>$J_2=88.60$ | 16 |
| 5Cu   | $[\text{Cu}_5(\text{N}_3)_{10}(\text{N},\text{N}'\text{-dmen})_5]_n$        | 102.2          | 3.50         | -                            | 16 |
| 4Cu   | $[\text{Cu}_4(\text{N}_3)_8(\text{L}^3)_2]_n$                               | 102.9<br>137.1 | 3.12<br>4.13 | $J_1=-0.70$<br>$J_2=64.9$    | 17 |

|     |                                                                                                                                      |                        |                      |                                                |    |
|-----|--------------------------------------------------------------------------------------------------------------------------------------|------------------------|----------------------|------------------------------------------------|----|
| 4Cu | [Cu <sub>4</sub> (N <sub>3</sub> ) <sub>6</sub> (L <sup>4</sup> ) <sub>2</sub> (H <sub>2</sub> O) <sub>2</sub> ]                     | 93.4<br>102.1<br>108.9 | 3.10<br>3.22         | J <sub>1</sub> =-81.0<br>J <sub>2</sub> =112.4 | 17 |
| 4Cu | [Cu <sub>4</sub> (N <sub>3</sub> ) <sub>6</sub> (L <sup>5</sup> ) <sub>2</sub> ] <sub>n</sub>                                        | 91.8<br>102.2<br>107.3 | 3.18<br>3.09<br>3.18 | J <sub>1</sub> =-77.9<br>J <sub>2</sub> =129.9 | 17 |
| 1Cu | [Cu(4-fba)(N <sub>3</sub> )(C <sub>2</sub> H <sub>5</sub> OH)]                                                                       | 105.2                  | 3.160                | 36.2                                           | 18 |
| 1Cu | [Cu( <i>o</i> -npa)(N <sub>3</sub> )(H <sub>2</sub> O)] <sub>n</sub>                                                                 | 110.3                  | 3.30                 | 35.44                                          | 19 |
| 1Cu | [Cu( <i>p</i> -npa)(N <sub>3</sub> )] <sub>n</sub>                                                                                   | 120.4                  | 3.39                 | 52.25                                          | 19 |
| 1Cu | [Cu( <i>p</i> -mpa)(N <sub>3</sub> )] <sub>n</sub>                                                                                   | 122.4                  | 3.46                 | -                                              | 19 |
| 1Cu | [Cu(L)(N <sub>3</sub> ) <sub>2</sub> ]                                                                                               | 89.8                   | 3.199                | 1.07                                           | 20 |
| 1Cu | [(CuN <sub>3</sub> (OH <sub>2</sub> )) <sub>2</sub> (adp)] <sub>n</sub>                                                              | 108.09                 | 3.248                | 38.4                                           | 21 |
| 1Cu | [Cu(2-fba)(N <sub>3</sub> )(CH <sub>3</sub> OH)] <sub>n</sub>                                                                        | 106.54                 | 3.206                | 63.54                                          | 22 |
| 1Cu | [Cu(2,6-dfba)(N <sub>3</sub> )(CH <sub>3</sub> OH)] <sub>n</sub>                                                                     | 110.08                 | 3.261                | 96.29                                          | 22 |
| 1Cu | [Cu( <i>o</i> -fpa)(N <sub>3</sub> )(C <sub>2</sub> H <sub>5</sub> OH)] <sub>n</sub>                                                 | 106.8                  | 3.218                | 87.08                                          | 23 |
| 1Cu | [Cu( <i>p</i> -fpa)(N <sub>3</sub> )(C <sub>2</sub> H <sub>5</sub> OH)] <sub>n</sub>                                                 | 104.8                  | 3.168                | 66.05                                          | 23 |
| 1Cu | [{Cu(2-ap)(N <sub>3</sub> ) <sub>2</sub> (H <sub>2</sub> O)} <sub>2</sub> ] <sub>n</sub>                                             | 103.3                  | 3.20                 | 66.7                                           | 24 |
| 3Cu | [Cu <sub>3</sub> (3-ap) <sub>2</sub> (N <sub>3</sub> ) <sub>6</sub> ] <sub>n</sub>                                                   | 101.3<br>102.2<br>99.0 | 3.01                 | J <sub>1</sub> =30<br>J <sub>2</sub> =67       | 24 |
| 1Cu | [Cu(3-fba)(N <sub>3</sub> )(C <sub>2</sub> H <sub>5</sub> OH)] <sub>n</sub>                                                          | 105.95                 | 3.192                | 59.74                                          | 25 |
| 2Cu | [Cu <sub>2</sub> (ip <sub>2</sub> en) <sub>2</sub> (μ <sub>1,1</sub> -N <sub>3</sub> ) <sub>2</sub> (N <sub>3</sub> ) <sub>2</sub> ] | 101.77<br>102.51       | 3.3526               | 7.0                                            | 26 |
| 1Cu | catena-[Cu(ambza)(μ <sub>1,1,3</sub> -N <sub>3</sub> ) <sub>2</sub> ]                                                                | 99.64                  | 3.4103               | 7.7                                            | 26 |
| 1Cu | [Cu(4-tfmba)(N <sub>3</sub> )(CH <sub>3</sub> OH)]                                                                                   | 107.04                 | 3.213                | 56.21                                          | 27 |
| 1Cu | [Cu(4-tfmba)(N <sub>3</sub> )(C <sub>2</sub> H <sub>5</sub> OH)]                                                                     | 106.53                 | 3.180                | 68.94                                          | 27 |
| 1Cu | [Cu(4-tfmba)(N <sub>3</sub> )(C <sub>3</sub> H <sub>7</sub> OH)]                                                                     | 107.93                 | 3.205                | 77.94                                          | 27 |

J<sup>n</sup> : intrachain coupling.

L1 = Me<sub>3</sub>NCH<sub>2</sub>CO<sub>2</sub>, Hpht = hydrogen phthalate, INO = isonicotinate *N*-oxide, NNO = nicotinate *N*-oxide, isonic = isonicotinate, phe<sub>a</sub> = 1-phenylethylamine, nic = nicotinate, hnta = 6-hydroxynicotinate, tp = terephthalate, 4-Hp<sub>ya</sub> = 4-pyridylacrylic acid, L<sup>2</sup> = 2-methyl-benzoate, *p*-CPAH = *p*-cyanophenoxyacetic acid, 2-Cl<sub>nic</sub> = 2-chloronicotinate, pyz = pyrazine, mptz = *N*-methyl-4-pyridinium tetrazolate, 4,3-pybz = 4-(3-pyridyl)benzoate, 4,4-pybz = 4-(4-pyridyl)benzoate, Me-hmpz = 1-methylhomopiperazine, men = *N*-methylethylenediamine, *N,N*-dmen =

*N,N*-dimethylethylenediamine, *N,N'*-dmen = *N,N'*-dimethylethylenediamine, L<sup>3</sup> is the imine resulting from the condensation of pyridine-2-carboxaldehyde with *N*-methylethylenediamine, HL<sup>4</sup> and HL<sup>5</sup> are the condensation products of 2-hydroxy-3-methoxybenzaldehyde with *N,N*-diethylethylenediamine and *N*-ethylethylenediamine respectively, 4-Hfba = 4-fluorobenzoic acid, *o*-Hfpa = *o*-fluorophenylacetic acid, *p*-Hfpa = *p*-fluorophenylacetic acid, L = *N*-benzyl ethylenediamine, adp = adipic acid, 2-Hfba = 2-fluorobenzoic acid, 2,6-Hdfba = 2,6-difluorobenzoic acid, *o*-Hnpa = *o*-nitrophenylacetic acid, *p*-Hnpa = *p*-nitrophenylacetic acid, and *p*-Hmpa = *p*-methylphenylacetic acid, 2-ap = 2-aminopyridine, 3-ap = 3-aminopyridine, and 4-ap = 4-aminopyridine, 3-fba = 3-fluorobenzoic acid, Et<sub>3</sub>en = *N,N,N'*-triethyl-1,2-diaminoethane; ip<sub>2</sub>en = *N,N'*-diisopropyl-1,2-diaminoethane; Et<sub>2</sub>Meen = *N,N*-diethyl-*N'*-methyl-1,2-diaminoethane; and ambza = 2-aminobenzylamine, H<sub>2</sub>L<sup>1</sup> = *N,N*-bis(3,5-dimethyl-2-hydroxybenzyl)-*N',N'*-dimethyl-1,3-diaminopropane, H<sub>2</sub>L<sup>2</sup> = *N,N*-bis(3,5-dimethyl-2-hydroxybenzyl)-*N',N'*-dimethyl-1,2-diaminoethane and H<sub>2</sub>L<sup>3</sup> = *N,N*-bis(3,5-dimethyl-2-hydroxybenzyl)-*N',N'*-diethyl-1,2-diaminoethane, L = *N,N*-dimethyl-*N'*-benzyl-ethylenediamine, 4-tfmba = 4-trifluoromethyl benzoic acid.

All of the J values were quoted using the Hamiltonian  $H = -\sum S_i \cdot S_{i+1}$ .

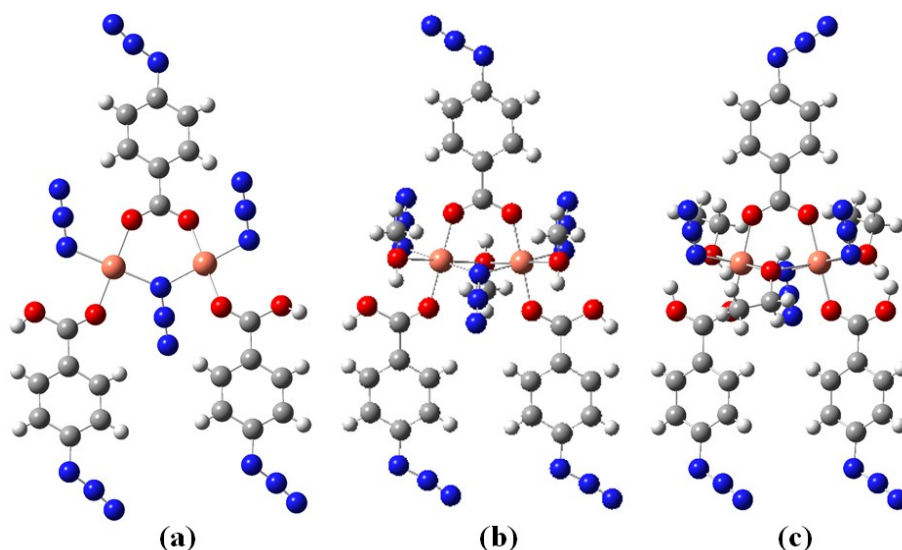

**Figure S1.** Magnetic cores used for computational study: (a) **1**, (b) **2**, (c) **3**.

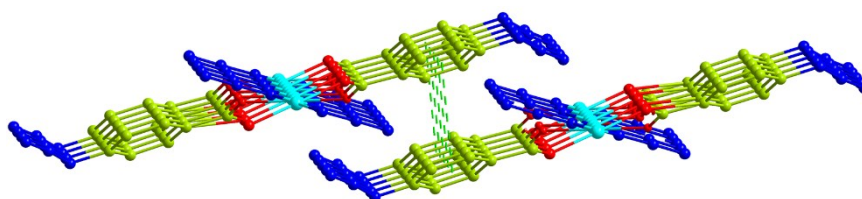

**Figure S2.**  $\pi \cdots \pi$  stacking between benzene rings in **1**.

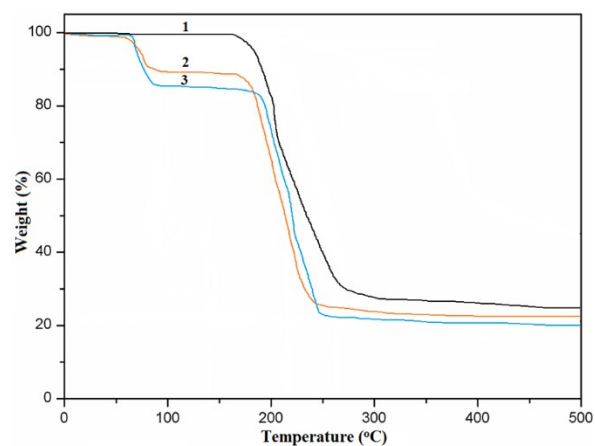

Figure S3. TG curves for 1-3.

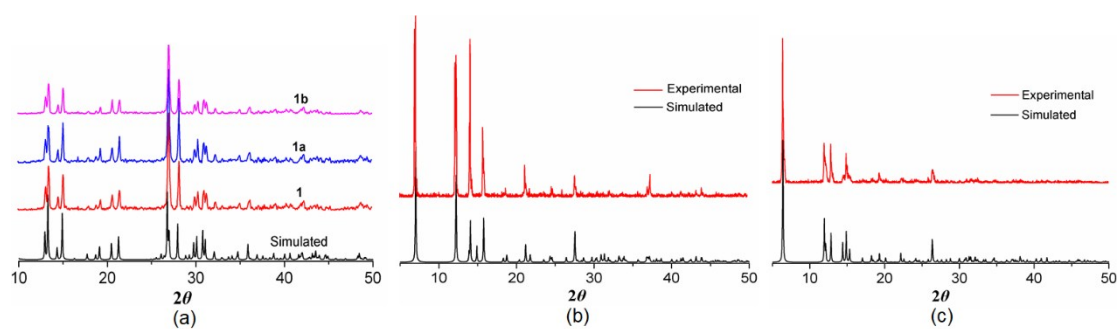

Figure S4. PXRD patterns for compounds: (a) 1, (b) 2, (c) 3.

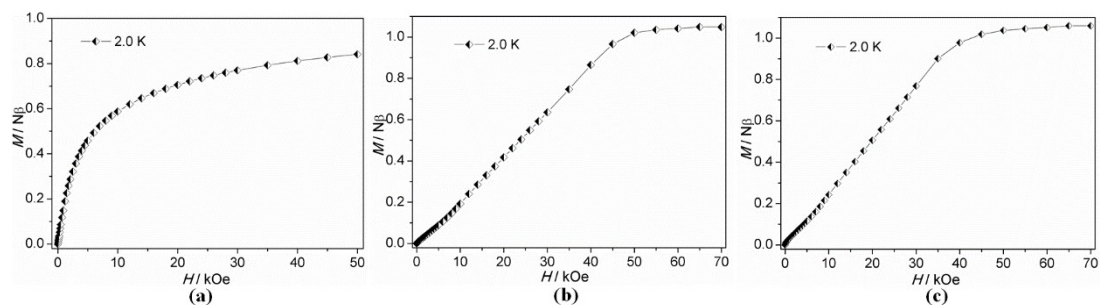

Figure S5. (a)  $M$  vs.  $H$  plots at 2 K for compounds: (a) 1, (b) 2, (c) 3.

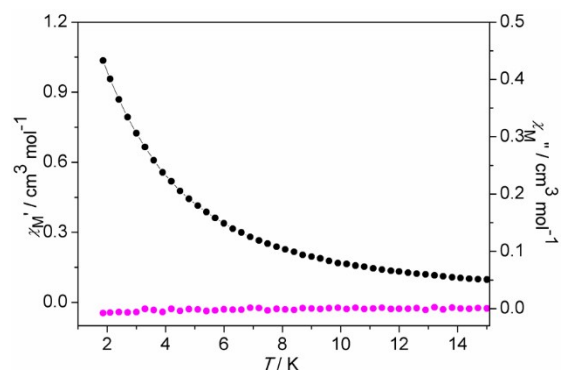

Figure S6.  $\chi'_M$  and  $\chi''_M$  vs  $T$  plots for 1.

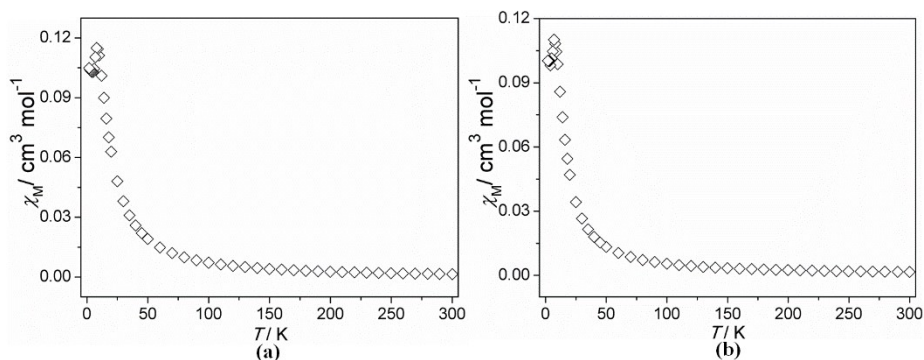

**Figure S7.**  $\chi_M$  vs  $T$  plots for **2** (a) and **3** (b).

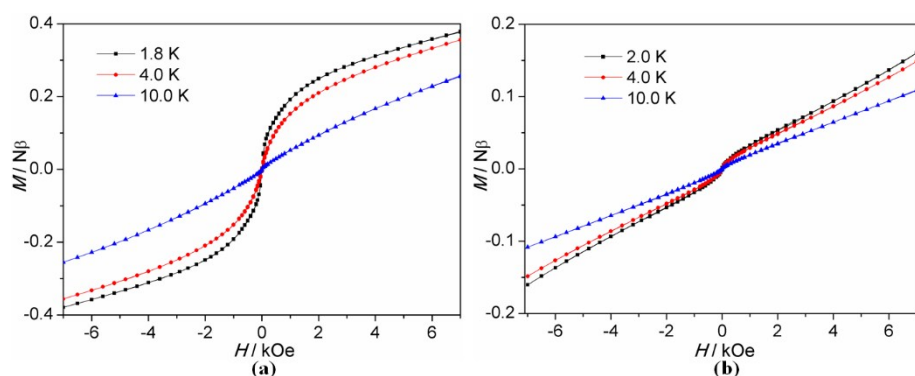

**Figure S8.** (a) Hysteresis loops for **2** (a) and **3** (b) at different temperatures.

## References

- 1 A. Escuer, R. Vicente, F. A. Mautner and M. A. Goher. *Inorg. Chem.*, 1997, **36**, 1233-1236.
- 2 L. K. Thompson, S. S. Tandon, F. Lloret, J. Cano and M. Julve. *Inorg. Chem.*, 1997, **36**, 3301-3306
- 3 Z. He, Z.-M. Wang, S. Gao and C.-H. Yan. *Inorg. Chem.*, 2006, **45**, 6694-6705;
- 4 Y.-F. Zeng, F.-C. Liu, J.-P. Zhao, S. Cai, X.-H. Bu and J. Ribas. *Chem. Commun.*, 2006, 2227-2229;
- 5 Z.-G. Gu, Y. Song, J.-L. Zuo and X.-Z. You. *Inorg. Chem.*, 2007, **46**, 9522-9524;
- 6 F.-C. Liu, Y.-F. Zeng, J.-P. Zhao, B.-W. Hu, E. C. Sanudo, J. Ribas and X.-H. Bu. *Inorg. Chem.*, 2007, **46**, 7698-7700
- 7 Y.-F. Zeng, J.-P. Zhao, B.-W. Hu, X. Hu, F.-C. Liu, J. Ribas and X.-H. Bu. *Chem.-Eur. J.*, 2007, **13**, 9924-9930.
- 8 Y.-F. Han, T.-W. Wang, Y. Song, Z. Shen and X.-Z. You. *Inorg. Chem. Commun.*, 2008, **11**, 207-210.
- 9 W.-W. Sun, X.-B. Qian, C.-Y. Tian and E.-Q. Gao. *Inorg. Chim. Acta.*, 2009, **362**, 2744-2748;
- 10 J.-P. Zhao, B.-W. Hu, E. C. Sañudo, Q. Yang, Y.-F. Zeng and X.-H. Bu. *Inorg. Chem.*, 2009, **48**, 2482-2489
- 11 G. E. Kostakis, K. C. Mondal, G. Abbas, Y. Lan, G. Novitchi, G. Buth, C. E. Ansonb and A. K. Powell. *CrystEngComm*, 2009, **11**, 2084-2088;
- 12 Q.-J. Su, S.-H. Li, L. Wang, C.-Z. Xie, Y. Ouyang and J.-Y. Xu. *Inorg. Chem. Commun.*, 2010, **13**, 1210-1212;
- 13 O. Sengupta, B. Gole, S. Mukherjee and P. S. Mukherjee. *Dalton Trans.*, 2010, **39**, 7451-7465
- 14 X.-B. Li, Y. Ma, X.-M. Zhang, J.-Y. Zhang and E.-Q. Gao. *Eur. J. Inorg. Chem.*, 2011, 4738-4744
- 15 X.-M. Zhang, Z.-M. Hao, W.-X. Zhang and X.-M. Chen. *Angew. Chem.*, 2007, **119**, 3526-3529
- 16 S. Mukherjee, Y. P. Patil and P. S. Mukherjee. *Dalton Trans.*, 2012, **41**, 54-64;
- 17 S. Mukherjee and P. S. Mukherjee. *Dalton Trans.*, 2013, **42**, 4019-4030.

- 18 X.-Y. Liu, S.-P. Chen, T. Grancha, E. Pardo, H.-S. Ke, B. Yin, Q. Wei, G. Xie and S.-L. Gao. *Dalton Trans.*, 2014, **43**, 15359-15366;
- 19 L. Yang, S. Zhang, X.-Y. Liu, Q. Yang, Q. Wei, G. Xie and S.-P. Chen. *CrystEngComm.*, 2014, **16**, 4194-4201.
- 20 P. P. Chakrabarty, S. Giri, D. Schollmeyer, H. Sakiyama, M. Mikuriya, A. Sarkar and S. Saha. *Polyhedron.*, 2015, **89**, 49-54
- 21 Z. Setifi, M. Ghazzali, C. Glidewell, O. Pérez, F. Setifi, C. J. Gómez-García and J. Reedijk. *Polyhedron.*, 2016, **117**, 244-248.
- 22 X.-Y. Liu, F.-F Li, X.-H. Ma, P.-P. Cen, S.-C. Luo, Q. Shi, S.-R. Ma, Y.-W. Wu, C.-C. Zhang, Z. Xu, W.-M. Song, G. Xie and S.-P. Chen. *Dalton Trans.*, 2017, **46**, 1207-1217.
- 23 X.-Y. Liu, X.-H Ma, P.-P, Cen, Y.-W. Wu, C.-C. Zhang, Q. Shi, W.-M. Song, G. Xie and S.-P. Chen, *Dalton Trans.*, 2017, **46**, 7556-7566.
- 24 P. Pandey, B. Kharediya, B. Elrez, J-P. Sutter, G. Bhargavi, M.V. Rajasekharan and S.S. Sunkari, *Dalton Trans.*, 2017, **46**, 15908-15918.
- 25 X.-H. Ma, Y.-W. Wu, P.-P. Cen, S. Ma, C.-C. Zhang, S.-C. Luo, H.-L. Zhou, W.-M. Son and X.-Y. Liu, *New J. Chem.*, 2017, **41**, 9631-9638.
- 26 S.S. Massoud, M.M. Henary, L. Maxwell, A. Martin, E. Ruiz, R. Vicente, R.C. Fischer and F.A. Mautner, *New J. Chem.*, 2018, **42**, 2627-2639.
- 27 P.-P, Cen, W.-Z, Yuan, S.-C, Luo, G. Xie and S.-P. Chen, *New J. Chem.*, 2019, **43**, 601-608.
